# Supplementary material
Source: HighWire-hosted journal article supplement (https://jnm.snmjournals.org/highwire/filestream/110926/field_highwire_adjunct_files/0/264448_Supplemental_Data.pdf)
Supplement: 264448_Supplemental_Data.pdf [file 264448_Supplemental_Data.pdf]

## Supplemental Figures

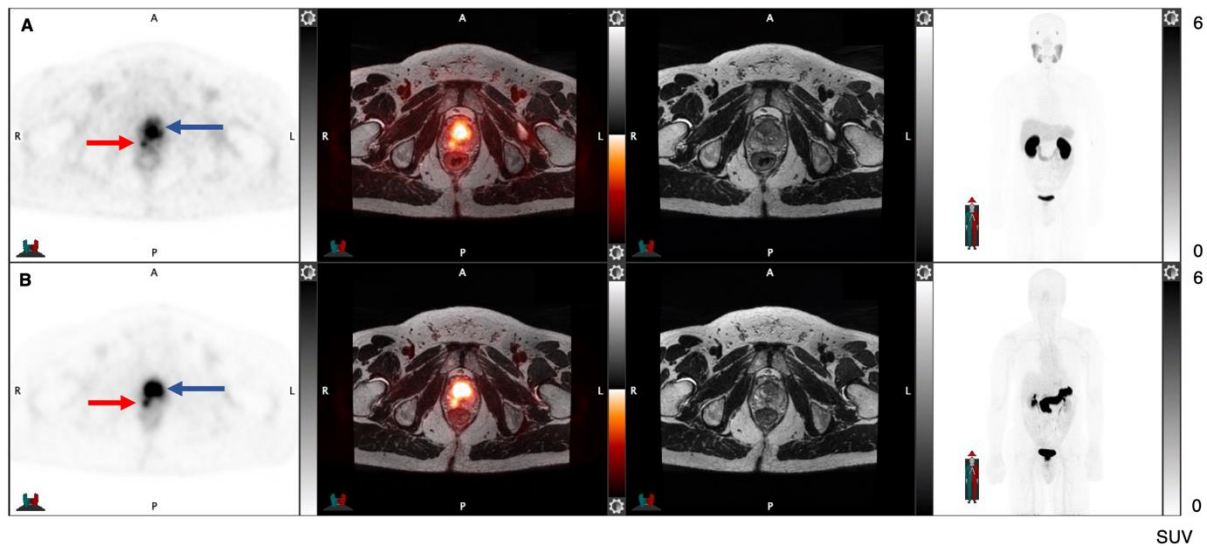

**Supplemental Figure 1:** 62-year-old man presenting with PSA 9.0 ng/mL and PSA density 0.24 ng/mL<sup>2</sup>.  $^{68}\text{Ga}$ -PSMA11 (A, axial PET, fused PET/MRI, MRI, and maximum intensity projection [MIP] images) and  $^{68}\text{Ga}$ -RM2 PET/MRI (B) show concordance of focal uptake anterior in the apex of the prostate (blue arrow) correlating to a Gleason 3+4 cancer and right medial (red arrow) corresponding to a Gleason 3+3 lesion.

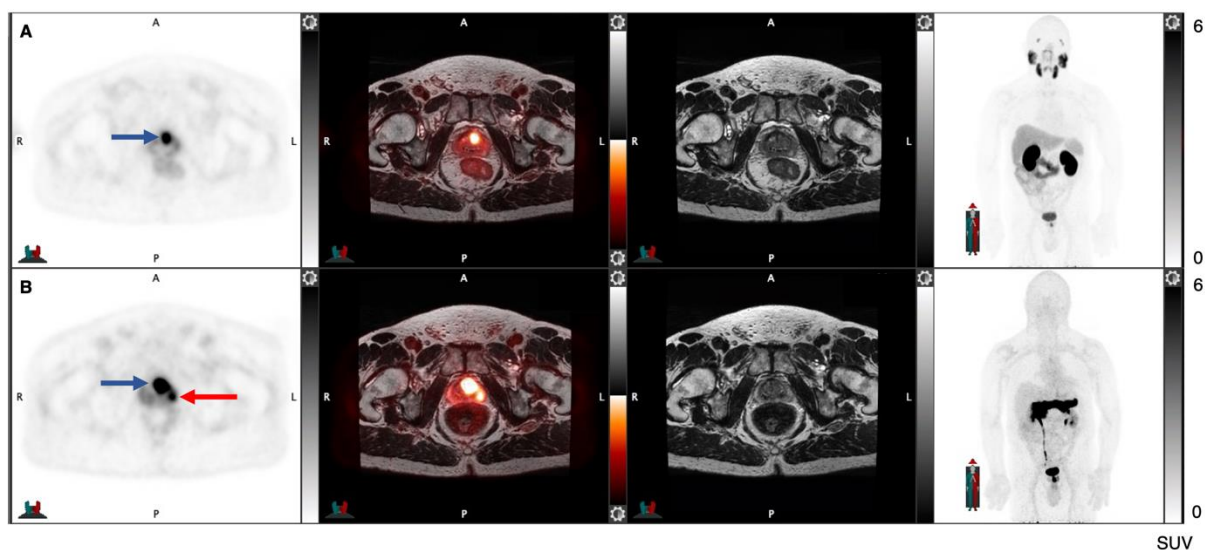

**Supplemental Figure 2:** 69-year-old patient with prior equivocal mpMRI and negative prostate biopsy but persistent elevated PSA of 20.9 ng/mL and PSA density 0.68 ng/mL<sup>2</sup>. <sup>68</sup>Ga-PSMA11 (A, axial PET, fused PET/MRI, MRI, and MIP images) and <sup>68</sup>Ga-RM2 PET/MRI (B) show congruent focal uptake anterior in the apex of the prostate (blue arrow) correlating to Gleason 4+5 cancer. <sup>68</sup>Ga-RM2 identified additional uptake lateral left (red arrow) corresponding to a Gleason 3+3 lesion.
